# Supplementary material for: In vivo assessment of neuroinflammation in progressive multiple sclerosis: a proof of concept study with [18F]DPA714 PET
Source: Springer Nature journal article supplement (doi:10.1186/s12974-018-1352-9), 2018-11-13
Supplement: MOESM1 [file 16269864]

**Supplementary Table 1: 2T4k\_VB\_1T1k - Percentage standard deviation for BP<sub>ND</sub> (k<sub>3</sub>/k<sub>4</sub>)**

|                    | MS-HAB |       |       |       | MS-MAB |       |        |       | HC-HAB |       |        | HC-MAB |       |       |       |
|--------------------|--------|-------|-------|-------|--------|-------|--------|-------|--------|-------|--------|--------|-------|-------|-------|
|                    | 1      | 2     | 3     | 4     | 1      | 2     | 3      | 4     | 1      | 2     | 3      | 1      | 2     | 3     | 4     |
| Frontal cortex     | 91.9%  | 18.6% | 15.6% | 25.1% | 44.8%  | 25.7% | 147.5% | 38.6% | 36.2%  | 24.5% | 32.3%  | 87.7%  | 36.7% | 22.4% | 29.5% |
| Paracentral cortex | 77.6%  | 14.7% | 16.7% | 17.8% | 49.0%  | 73.8% | 113.1% | 31.1% | 39.4%  | 25.1% | 22.7%  | 73.0%  | 38.8% | 17.9% | 23.8% |
| Parietal cortex    | 82.2%  | 10.5% | 16.8% | 22.3% | 37.3%  | 33.9% | 90.3%  | 28.4% | 33.7%  | 26.1% | 24.7%  | 71.1%  | 37.4% | 16.9% | 28.1% |
| Temporal cortex    | 89.7%  | 18.0% | 21.4% | 30.2% | 39.4%  | 40.3% | 101.8% | 42.1% | 64.4%  | 29.0% | 37.4%  | 89.5%  | 52.7% | 30.1% | 35.5% |
| Occipital cortex   | 90.9%  | 12.4% | 17.9% | 9.3%  | 51.7%  | 24.6% | 79.9%  | 28.3% | 23.0%  | 25.8% | 31.1%  | 88.2%  | 18.8% | 12.3% | 17.0% |
| Cingulate cortex   | 96.5%  | 27.2% | 18.8% | 40.9% | 34.9%  | 29.4% | 387.5% | 62.8% | 70.7%  | 42.7% | 40.5%  | 47.1%  | 57.8% | 22.9% | 38.5% |
| Thalamic GM        | 75.6%  | 21.9% | 32.5% | 19.0% | 41.5%  | 40.0% | 190.4% | 35.4% | 28.8%  | 39.0% | 177.9% | 74.4%  | 92.6% | 31.4% | 22.8% |
| Hippocampal GM     | 64.0%  | 38.3% | 24.2% | 45.1% | 48.7%  | 22.4% | 252.7% | 87.9% | 35.8%  | 29.3% | 45.7%  | 61.0%  | 94.6% | 63.4% | 42.4% |
| Cerebellar GM      | 80.4%  | 13.1% | 17.4% | 9.6%  | 56.7%  | 30.4% | 88.7%  | 34.6% | 20.8%  | 29.5% | 23.1%  | 127.8% | 24.7% | 13.7% | 20.2% |
| Cerebellar WM      | 70.9%  | 14.3% | 16.7% | 15.8% | 40.8%  | 22.8% | 764.8% | 24.8% | 23.1%  | 17.6% | 19.7%  | 153.8% | 20.8% | 14.1% | 10.1% |
| Brainstem WM       | 67.9%  | 14.1% | 20.2% | 30.9% | 55.0%  | 22.5% | 306.3% | 44.9% | 23.6%  | 17.8% | 23.0%  | 43.5%  | 42.5% | 35.1% | 15.4% |
| T2 MS lesions      | 201.8% | 24.3% | 27.5% | 33.4% | 134.4% | 18.1% | 599.7% | 27.1% |        |       |        |        |       |       |       |

Abbreviations: GM = grey matter, HAB = high affinity binder, HC = healthy control, MAB = medium affinity binder, MS= multiple sclerosis, WM = white matter
