# Supplementary material for: In vivo assessment of neuroinflammation in progressive multiple sclerosis: a proof of concept study with [18F]DPA714 PET
Source: Springer Nature journal article supplement (doi:10.1186/s12974-018-1352-9), 2018-11-13
Supplement: MOESM2 [file 16269864]

**Supplementary Table 2: 2T4k\_V<sub>B</sub>\_1T1k - Percentage standard deviation for k<sub>b</sub>**

|                    | MS-HAB |       |        |       | MS-MAB |       |       |       | HC-HAB |       |       | HC-MAB |       |       |       |
|--------------------|--------|-------|--------|-------|--------|-------|-------|-------|--------|-------|-------|--------|-------|-------|-------|
|                    | 1      | 2     | 3      | 4     | 1      | 2     | 3     | 4     | 1      | 2     | 3     | 1      | 2     | 3     | 4     |
| Frontal cortex     | 166.4% | 23.4% | 49.4%  | 19.8% | 46.4%  | 9.0%  | 25.5% | 16.7% | 24.2%  | 17.2% | 21.8% | 163.6% | 23.0% | 35.9% | 11.9% |
| Paracentral cortex | 171.1% | 17.5% | 133.2% | 14.0% | 48.7%  | 23.2% | 23.9% | 14.3% | 27.1%  | 16.2% | 20.7% | 99.8%  | 16.6% | 36.6% | 10.8% |
| Parietal cortex    | 152.9% | 20.1% | 58.8%  | 14.2% | 45.2%  | 11.5% | 16.4% | 11.6% | 19.8%  | 13.7% | 21.3% | 82.2%  | 12.7% | 22.2% | 9.9%  |
| Temporal cortex    | 150.3% | 22.1% | 74.4%  | 22.5% | 50.3%  | 13.5% | 20.5% | 18.3% | 40.7%  | 18.2% | 26.7% | 278.5% | 31.7% | 42.8% | 12.5% |
| Occipital cortex   | 152.6% | 11.5% | 51.7%  | 5.3%  | 59.8%  | 9.4%  | 15.6% | 11.5% | 11.8%  | 12.3% | 17.5% | 129.7% | 16.0% | 26.5% | 7.1%  |
| Cingulate cortex   | 167.4% | 49.0% | 63.0%  | 32.7% | 33.2%  | 12.2% | >999% | 21.2% | 42.1%  | 24.4% | 41.1% | 67.7%  | 37.1% | 60.1% | 15.5% |
| Thalamic GM        | 258.8% | 27.2% | 178.4% | 18.2% | 66.2%  | 12.2% | 29.7% | 15.0% | 46.0%  | 22.4% | 98.6% | 160.4% | >999% | 32.4% | 14.9% |
| Hippocampal GM     | 141.2% | 29.0% | 66.4%  | 26.8% | 55.9%  | 4.8%  | >999% | 36.3% | 32.1%  | 29.1% | 31.2% | 328.6% | 72.6% | 91.7% | 31.3% |
| Cerebellar GM      | 169.9% | 18.2% | 40.9%  | 5.6%  | 56.7%  | 48.3% | 27.2% | 14.8% | 12.8%  | 14.6% | 18.3% | 223.7% | 10.7% | 18.8% | 8.4%  |
| Cerebellar WM      | 18.8%  | 18.0% | 30.7%  | 12.5% | 48.9%  | 17.5% | >999% | 17.5% | 18.0%  | 12.3% | 18.8% | >999%  | 14.7% | 30.5% | 6.7%  |
| Brainstem WM       | 21.5%  | 21.5% | 50.1%  | 21.8% | 42.9%  | 16.2% | >999% | 24.9% | 44.6%  | 18.4% | 21.5% | 155.9% | 35.9% | 27.3% | 14.6% |
| T2 MS lesions      | 740.0% | 27.2% | 42.9%  | 29.2% | 212.5% | 16.5% | >999% | 21.6% |        |       |       |        |       |       |       |

Abbreviations: GM = grey matter, HAB = high affinity binder, HC = healthy control, MAB = medium affinity binder, MS= multiple sclerosis, WM = white matter
