# Supplementary material for: In vivo assessment of neuroinflammation in progressive multiple sclerosis: a proof of concept study with [18F]DPA714 PET
Source: Springer Nature journal article supplement (doi:10.1186/s12974-018-1352-9), 2018-11-13
Supplement: MOESM3 [file 16269864]

**Supplementary Table 3: 2T4k\_V<sub>B</sub> - Percentage standard deviation for BP<sub>ND</sub> (k<sub>3</sub>/k<sub>4</sub>)**

|                    | MS-HAB |       |       |       | MS-MAB |       |       |       | HC-HAB |       |       | HC-MAB |       |       |       |
|--------------------|--------|-------|-------|-------|--------|-------|-------|-------|--------|-------|-------|--------|-------|-------|-------|
|                    | 1      | 2     | 3     | 4     | 1      | 2     | 3     | 4     | 1      | 2     | 3     | 1      | 2     | 3     | 4     |
| Frontal cortex     | 51.4%  | 14.5% | 15.4% | 20.0% | 13.7%  | 11.3% | 22.9% | 14.4% | 22.4%  | 21.5% | 19.0% | 12.7%  | 9.8%  | 9.0%  | 12.5% |
| Paracentral cortex | 47.7%  | 12.7% | 15.7% | 18.7% | 14.3%  | 17.2% | 36.9% | 13.7% | 20.5%  | 21.0% | 19.5% | 13.7%  | 10.3% | 7.8%  | 11.9% |
| Parietal cortex    | 41.8%  | 9.3%  | 16.3% | 18.8% | 14.2%  | 9.0%  | 15.0% | 10.3% | 18.1%  | 19.3% | 16.9% | 13.3%  | 8.4%  | 7.0%  | 10.3% |
| Temporal cortex    | 48.9%  | 13.0% | 19.9% | 20.7% | 17.9%  | 9.9%  | 15.5% | 14.3% | 32.0%  | 20.0% | 23.4% | 15.4%  | 15.1% | 11.9% | 11.2% |
| Occipital cortex   | 39.7%  | 11.4% | 17.6% | 14.4% | 16.4%  | 9.2%  | 14.5% | 10.2% | 14.4%  | 14.9% | 18.2% | 12.6%  | 6.4%  | 4.6%  | 9.4%  |
| Cingulate cortex   | 51.0%  | 16.8% | 17.3% | 25.2% | 11.8%  | 10.8% | 11.6% | 15.4% | 33.3%  | 23.6% | 28.3% | 15.6%  | 25.6% | 10.9% | 14.6% |
| Thalamic GM        | 61.0%  | 13.2% | 29.9% | 23.0% | 19.0%  | 9.8%  | 35.2% | 20.8% | 24.8%  | 30.4% | 89.7% | 21.4%  | 16.9% | 11.8% | 23.0% |
| Hippocampal GM     | 38.9%  | 21.8% | 22.6% | 33.7% | 24.0%  | 10.3% | 19.4% | 32.6% | 31.4%  | 33.2% | 30.8% | 32.2%  | 53.9% | 38.3% | 18.5% |
| Cerebellar GM      | 38.2%  | 9.7%  | 17.8% | 15.7% | 14.5%  | 17.5% | 27.0% | 11.6% | 12.4%  | 17.1% | 21.1% | 13.5%  | 9.5%  | 6.6%  | 10.4% |
| Cerebellar WM      | 30.9%  | 11.6% | 16.2% | 13.8% | 13.1%  | 14.0% | 18.3% | 14.9% | 12.8%  | 16.2% | 17.4% | 18.4%  | 9.5%  | 7.5%  | 10.8% |
| Brainstem WM       | 45.5%  | 11.8% | 18.8% | 23.0% | 19.6%  | 18.2% | 14.1% | 20.4% | 17.8%  | 15.8% | 20.5% | 23.3%  | 20.6% | 23.4% | 15.4% |
| T2 MS lesions      | 36.3%  | 12.7% | 20.0% | 20.4% | 12.6%  | 13.1% | 18.2% | 14.3% |        |       |       |        |       |       |       |

Abbreviations: GM = grey matter, HAB = high affinity binder, HC = healthy control, MAB = medium affinity binder, MS= multiple sclerosis, WM = white matter
